# Numerical reproduction of the Sherrington-Adrian observations through a community of McCulloch-Pitts neurons with plastic remodelling

Luis Irastorza-Valera<sup>a,d</sup>, José María Benítez<sup>a</sup>, Francisco J. Montans<sup>a,e</sup>  
and Luis Saucedo-Mora<sup>a,b,c,\*</sup>

<sup>a</sup> *E.T.S. de Ingeniería Aeronáutica y del Espacio, Universidad Politécnica de Madrid, Pza. Cardenal Cisneros 3, 28040, Madrid, Spain*

<sup>b</sup> *Department of Materials, University of Oxford, Parks Road, Oxford, OX1 3PJ, UK*

<sup>c</sup> *Department of Nuclear Science and Engineering, Massachusetts Institute of Technology, MA02139, USA*

<sup>d</sup> *PIMM Lab, ENSAM (Arts et Métiers ParisTech, 151 Bd de l'Hôpital, Paris, France*

<sup>e</sup> *Department of Mechanical and Aerospace Engineering, Herbert Wertheim College of Engineering, University of Florida, FL32611, USA*

\* *Corresponding author: Luis Saucedo-Mora, e-mail: [luis.saucedo@upm.es](mailto:luis.saucedo@upm.es)*

---

## Abstract

Neurons form a highly complex network that produces cognition from simple associative rules. From previous results, this work shows the natural capability of the numerical network produced to modulate the output signal with independence of the intensity of the stimuli. Moreover, the plastic remodelling implemented in the model is capable to change the latency of a wide range of stimuli to synchronize them and adjust to a required delay of the signal.

*Keywords:* neuronal model, plastic remodelling, signal homogenization, latency

---

## 1. Methodology and results

2 Regarding brain activity, Adrian observed that with independence of the amp-  
3 litude of stimuli, the amplitude of the response was unaffected [2]. Latter ob-  
4 servations demonstrated that the impedance of the brain is independent of the  
5 frequency of the stimulation [9]. Other works, such as McNamara et al. [11]

6 shows this tendency of the neuronal circuits to stabilize different input signals,  
7 and its implication in diseases such as Parkinson. This stability also have implic-  
8 ations in disorders generated by Glioblastoma multiforme [5], which generates  
9 a variation of the mechanical loads in certain regions of the brain.

10 This tendency of the brain has been modelled [12] [3] to reproduce the stabil-  
11 ization of signals through noise inserted in the neuronal circuit. And supported  
12 by experimental results [4], concluded that there is an adaptation in the neu-  
13 ronal network that tends to stabilize the response of the system. Therefore, the  
14 concept of metastability [13] is aligned with those results. For the Sherrington-  
15 Adrian observations [2] [8], the authors received the nobel prize of medicine in  
16 1932 arguing that they "discovered that the explosive waves of impulses dis-  
17 charged along the nerve are always the same size, regardless of how strong the  
18 stimulus is" [1].

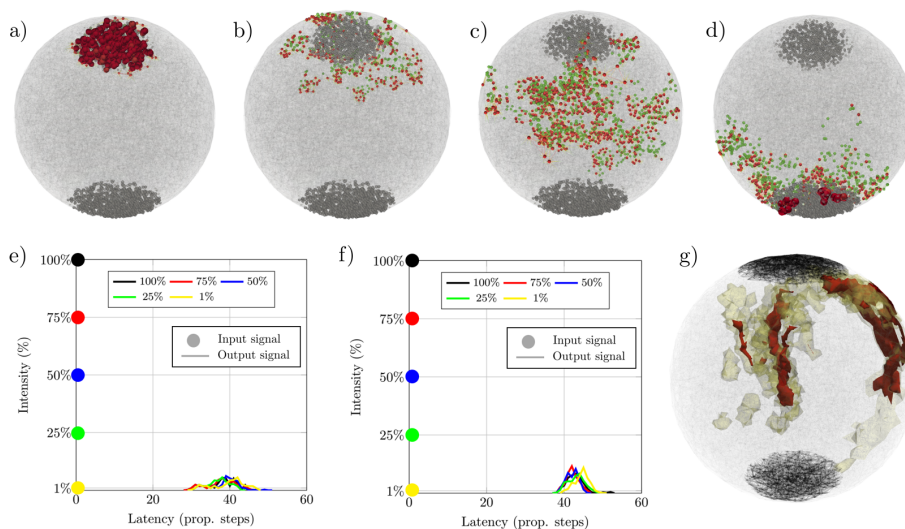

Figure 1: Signal propagation through a network of McCulloch-Pitts neurons, and its plastic remodelling. From a) to d) we show the propagation of a signal with the 100 % of initial stimulation, and remodelled, at the steps of propagation 0 (a), 5 (b), 15 (c) and 35 (d), the red dots are the neurons fired at this step, and the green dots their pre-synaptic neurons. The remodelled peak of the signals is at 45 steps of propagation. e) shows the original signal outputs of the network under different stimuli, and f) are the remodelled outputs of the network, which are intended to be the same and centred at 45 steps of propagation. Those output curves are the density of output neurons that are excited at each step. g) shows the regions where the remodelled neurons are, in this case, for an early global plastic remodelling. Here in g) the red region shows the zone with higher density of remodelling, and the yellow one has a lower amount. If we consider the propagation speed of the signal as  $10\text{ m/s}$ , each step of propagation of this figure can be assumed as around  $5\ \mu\text{s}$ .

19 The model proposed in this work is a neuronal network based on simple  
20 McCulloch-Pitts neurons [10], which are capable to do plastic remodelling to

21 adapt to a required signal delay [6]. The model is a sphere with a radius of  
22 2 mm, and 40.000 neurons, which is lower than the neuronal density of the  
23 brain that can be considered as 40.000 neurons/ $mm^3$  [7]. The sphere has 1.000  
24 neurons in the top where the excitation begins, and 1.000 neurons on the bottom  
25 in charge of the supervision of the plastic remodelling [6]. Figure 1 shows the  
26 results of the model when different signals within a full range of intensity are  
27 used to excite the same neuronal network.

28 The preliminary result of Figure 1 shows the capability of the network to  
29 modulate the signals and to produce the same output excitation regardless of  
30 the intensity of the stimuli, which ranges from 100% of the neurons excited (i.e.  
31 1.000) to a 1% (i.e. 10 neurons). Figure 1a-d shows the case with the 100% of  
32 the input neurons excited, and the colors denote the neurons fired (red) and the  
33 pre-synaptic neurons of those (green). In all the cases, with different stimuli,  
34 the output pulse is equal in size and latency.

## 35 **2. Conclusions**

36 The presented work shows the natural capability of this model to modulate  
37 signals with input stimulus of different intensity, and that it is done even with  
38 a low number of McCulloch-Pitts neurons. Also, we demonstrate that through  
39 plastic remodelling the neuronal network can synchronize and modulate the  
40 responses to different stimuli, and even simultaneously adapt them to a required  
41 signal delay.

## 42 **Declarations**

43 *Ethics approval and consent to participate*

44 Not applicable.

45 *Consent for publication*

46 Not applicable.

47 *Availability of data and materials*

48 The data will be provided under request to the corresponding author.

49 *Competing interests*

50 The authors do not have any competing of interest.

51 *Funding*

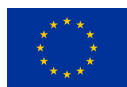

52 *This project has received funding from the European Union's Horizon 2020 research and innovation programme under the Marie Skłodowska-Curie Grant Agreement No. 956401*

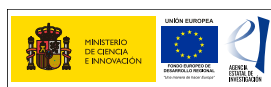

53 *Grant PID2021-126051OB-C43 funded by MCIN/AEI/ 10.13039/501100011033 and by "ERDF A way of making Europe".*

54 *Authors' contributions*

55 LIV crated the new software used in the work and drafted the work. JMB in-  
56 terpretation of data and revision. FJM interpretation of data and revision. LSM  
57 conception and design of the work, creation of new software used in the work,  
58 interpretation of data and revision. All authors approved the final Manuscript

59 *Acknowledgements*

60 Not applicable.

61 **References**

- 62 [1] Spread read nobel in medicine 1932. ht-  
63 tps://www.nobelprize.org/prizes/medicine/1932/speedread/.
- 64 [2] E. D. Adrian. The spread of activity in the cerebral cortex. *The Journal*  
65 *of Physiology*, 88(2):127–161, November 1936.
- 66 [3] Ghaith Bouallegue, Ridha Djemal, and Kais Belwafi. Artificial EEG signal  
67 generated by a network of neurons with one and two dendrites. *Results in*  
68 *Physics*, 20:103699, January 2021.
- 69 [4] Galit Fuhrmann, Henry Markram, and Misha Tsodyks. Spike frequency ad-  
70 aptation and neocortical rhythms. *Journal of Neurophysiology*, 88(2):761–  
71 770, August 2002.

- 72 [5] R.M. Ganji, H. Jafari, S.P. Moshokoa, and N.S. Nkomo. A mathemat-  
73 ical model and numerical solution for brain tumor derived using fractional  
74 operator. *Results in Physics*, 28:104671, September 2021.
- 75 [6] Luis Irastorza, Luis Saucedo-Mora, Jose Maria Benitez, and Fran-  
76 cisco J. Montans. An agent based model (abm) to reproduce  
77 the boolean logic behaviour of neuronal self organized communities  
78 through pulse delay modulation and generation of logic gates. *ht-*  
79 *tps://doi.org/10.1101/2023.11.10.566538*, 2023.
- 80 [7] G. Leuba and L.J. Garey. Comparison of neuronal and glial numerical  
81 density in primary and secondary visual cortex of man. *Experimental Brain*  
82 *Research*, 77(1), 1989.
- 83 [8] David N. Levine. Sherrington's "the integrative action of the nervous sys-  
84 tem": A centennial appraisal. *Journal of the Neurological Sciences*, 253(1-  
85 2):1–6, February 2007.
- 86 [9] Nikos K. Logothetis, Christoph Kayser, and Axel Oeltermann. In vivo  
87 measurement of cortical impedance spectrum in monkeys: Implications for  
88 signal propagation. *Neuron*, 55(5):809–823, September 2007.
- 89 [10] Warren S. McCulloch and Walter Pitts. A logical calculus of the ideas  
90 immanent in nervous activity. *The Bulletin of Mathematical Biophysics*,  
91 5(4):115–133, December 1943.
- 92 [11] Colin G. McNamara, Max Rothwell, and Andrew Sharott. Stable, inter-  
93 active modulation of neuronal oscillations produced through brain-machine  
94 equilibrium. *Cell Reports*, 41(6):111616, November 2022.
- 95 [12] Max Nolte, Michael W. Reimann, James G. King, Henry Markram, and  
96 Eilif B. Muller. Cortical reliability amid noise and chaos. *Nature Commu-*  
97 *nications*, 10(1), August 2019.
- 98 [13] Emmanuelle Tognoli and J. A. Scott Kelso. The metastable brain. *Neuron*,  
99 81(1):35–48, January 2014.
